# Supplementary material for: Epidemiological clustered characteristics of coronavirus disease 2019 (COVID-19) in three phases of transmission in Jilin Province, China
Source: PubMed Central journal article supplement (PMC9851530; doi:10.1371/journal.pone.0279879), 2023-01-19
Supplement: pone.0279879.s001.pdf [file pone.0279879.s001.pdf]

The first epidemic phase

| Case Number | The onset date | Date of diagnosis |
|-------------|----------------|-------------------|
| 1           | 2020/1/12      | 2020/1/23         |
| 2           | 2020/1/17      | 2020/1/25         |
| 3           | 2020/1/22      | 2020/1/24         |
| 4           | 2020/1/15      | 2020/1/24         |
| 5           | 2020/1/22      | 2020/1/27         |
| 6           | 2020/1/25      | 2020/1/27         |
| 7           | 2020/1/17      | 2020/1/28         |
| 8           | 2020/1/26      | 2020/1/28         |
| 9           | 2020/1/27      | 2020/1/29         |
| 10          | 2020/1/24      | 2020/1/30         |
| 11          | 2020/1/19      | 2020/1/30         |
| 12          | 2020/1/23      | 2020/1/30         |
| 13          | 2020/1/22      | 2020/1/30         |
| 14          | 2020/1/23      | 2020/1/30         |
| 15          | 2020/1/25      | 2020/2/1          |
| 16          | 2020/1/22      | 2020/2/1          |
| 17          | 2020/1/27      | 2020/2/1          |
| 18          | 2020/1/27      | 2020/2/2          |
| 19          | 2020/1/28      | 2020/2/2          |
| 20          | 2020/1/29      | 2020/2/2          |
| 21          | 2020/1/22      | 2020/2/2          |
| 22          | 2020/1/22      | 2020/2/2          |
| 23          | 2020/1/22      | 2020/2/2          |
| 24          | 2020/1/31      | 2020/2/3          |
| 25          | 2020/1/24      | 2020/2/3          |
| 26          | 2020/1/24      | 2020/2/3          |
| 27          | 2020/1/29      | 2020/2/3          |
| 28          | 2020/1/28      | 2020/2/3          |
| 29          | 2020/1/27      | 2020/2/3          |
| 30          | 2020/1/23      | 2020/2/3          |
| 31          | 2020/1/26      | 2020/2/4          |
| 32          | 2020/2/1       | 2020/2/4          |
| 33          | 2020/1/27      | 2020/2/4          |
| 34          | 2020/1/23      | 2020/2/4          |
| 35          | 2020/1/28      | 2020/2/4          |
| 36          | 2020/1/30      | 2020/2/4          |
| 37          | 2020/1/30      | 2020/2/4          |
| 38          | 2020/1/30      | 2020/2/4          |
| 39          | 2020/1/30      | 2020/2/4          |
| 40          | 2020/1/23      | 2020/2/4          |
| 41          | 2020/1/20      | 2020/2/4          |
| 42          | 2020/1/28      | 2020/2/5          |
| 43          | 2020/1/26      | 2020/2/5          |
| 44          | 2020/1/30      | 2020/2/5          |
| 45          | 2020/1/28      | 2020/2/5          |
| 46          | 2020/2/3       | 2020/2/5          |
| 47          | 2020/1/28      | 2020/2/5          |
| 48          | 2020/2/1       | 2020/2/5          |
| 49          | 2020/1/30      | 2020/2/5          |
| 50          | 2020/1/30      | 2020/2/5          |
| 51          | 2020/1/30      | 2020/2/5          |
| 52          | 2020/2/1       | 2020/2/5          |

|    |           |           |
|----|-----------|-----------|
| 53 | 2020/1/22 | 2020/2/5  |
| 54 | 2020/2/2  | 2020/2/6  |
| 55 | 2020/1/31 | 2020/2/6  |
| 56 | 2020/1/29 | 2020/2/6  |
| 57 | 2020/2/4  | 2020/2/6  |
| 58 | 2020/1/29 | 2020/2/6  |
| 59 | 2020/2/4  | 2020/2/7  |
| 60 | 2020/2/3  | 2020/2/7  |
| 61 | 2020/2/3  | 2020/2/7  |
| 62 | 2020/1/31 | 2020/2/7  |
| 63 | 2020/2/3  | 2020/2/7  |
| 64 | 2020/2/6  | 2020/2/7  |
| 65 | 2020/2/5  | 2020/2/8  |
| 66 | 2020/2/1  | 2020/2/8  |
| 67 | 2020/2/4  | 2020/2/8  |
| 68 | 2020/1/29 | 2020/2/8  |
| 69 | 2020/2/6  | 2020/2/9  |
| 70 | 2020/2/7  | 2020/2/9  |
| 71 | 2020/1/31 | 2020/2/9  |
| 72 | 2020/2/1  | 2020/2/9  |
| 73 | 2020/2/1  | 2020/2/9  |
| 74 | 2020/2/4  | 2020/2/9  |
| 75 | 2020/1/28 | 2020/2/9  |
| 76 | 2020/2/7  | 2020/2/9  |
| 77 | 2020/1/28 | 2020/2/9  |
| 78 | 2020/2/9  | 2020/2/10 |
| 79 | 2020/2/2  | 2020/2/10 |
| 80 | 2020/2/4  | 2020/2/11 |
| 81 | 2020/2/4  | 2020/2/12 |
| 82 | 2020/2/2  | 2020/2/12 |
| 83 | 2020/2/1  | 2020/2/13 |
| 84 | 2020/2/11 | 2020/2/14 |
| 85 | 2020/2/1  | 2020/2/14 |
| 86 | 2020/2/7  | 2020/2/15 |
| 87 | 2020/2/14 | 2020/2/15 |
| 88 | 2020/2/12 | 2020/2/16 |
| 89 | 2020/2/12 | 2020/2/19 |
| 90 | 2020/2/18 | 2020/2/20 |
| 91 | 2020/2/19 | 2020/2/24 |
| 92 | 2020/2/14 | 2020/2/24 |
| 93 | 2020/1/26 | 2020/2/3  |
| 94 | 2020/2/5  | 2020/2/5  |
| 95 | 2020/2/7  | 2020/2/7  |
| 96 | 2020/2/14 | 2020/2/14 |
| 97 | 2020/2/14 | 2020/2/14 |

## The second epidemic phase

| Case Number | the onset date | Date of diagnosis |
|-------------|----------------|-------------------|
| 1           | 2020/5/5       | 2020/5/10         |
| 2           | 2020/5/11      | 2020/5/14         |
| 3           | 2020/5/16      | 2020/5/16         |
| 4           | 2020/5/3       | 2020/5/9          |
| 5           | 2020/5/5       | 2020/5/9          |
| 6           | 2020/5/3       | 2020/5/23         |
| 7           | 2020/5/6       | 2020/5/9          |
| 8           | 2020/5/7       | 2020/5/9          |
| 9           | 2020/5/6       | 2020/5/9          |
| 10          | 2020/5/1       | 2020/5/9          |
| 11          | 2020/4/30      | 2020/5/12         |
| 12          | 2020/5/7       | 2020/5/9          |
| 13          | 2020/5/1       | 2020/5/9          |
| 14          | 2020/5/3       | 2020/5/10         |
| 15          | 2020/5/8       | 2020/5/10         |
| 16          | 2020/5/10      | 2020/5/12         |
| 17          | 2020/5/10      | 2020/5/12         |
| 18          | 2020/5/12      | 2020/5/12         |
| 19          | 2020/5/11      | 2020/5/12         |
| 20          | 2020/5/11      | 2020/5/12         |
| 21          | 2020/5/10      | 2020/5/12         |
| 22          | 2020/5/11      | 2020/5/13         |
| 23          | 2020/5/15      | 2020/5/16         |
| 24          | 2020/5/12      | 2020/5/17         |
| 25          | 2020/5/14      | 2020/5/17         |
| 26          | 2020/5/17      | 2020/5/18         |
| 27          | 2020/5/10      | 2020/5/10         |
| 28          | 2020/5/12      | 2020/5/14         |
| 29          | 2020/5/14      | 2020/5/15         |
| 30          | 2020/5/14      | 2020/5/16         |
| 31          | 2020/5/14      | 2020/5/17         |
| 32          | 2020/5/13      | 2020/5/14         |
| 33          | 2020/5/15      | 2020/5/18         |
| 34          | 2020/5/15      | 2020/5/18         |
| 35          | 2020/5/14      | 2020/5/18         |
| 36          | 2020/5/18      | 2020/5/19         |
| 37          | 2020/5/21      | 2020/5/21         |
| 38          | 2020/5/21      | 2020/5/21         |
| 39          | 2020/5/23      | 2020/5/23         |
| 40          | 2020/4/25      | 2020/5/7          |
| 41          | 2020/5/8       | 2020/5/10         |
| 42          | 2020/5/11      | 2020/5/12         |
| 43          | 2020/5/10      | 2020/5/14         |
| 44          | 2020/5/10      | 2020/5/15         |
| 45          | 2020/5/9       | 2020/5/15         |
| 46          | 2020/5/18      | 2020/5/19         |

The third epidemic phase

| Case Number | the onset date | Date of diagnosis |
|-------------|----------------|-------------------|
| 1           | 2021/1/17      | 2021/1/17         |
| 2           | 2021/1/17      | 2021/1/17         |
| 3           | 2021/1/17      | 2021/1/17         |
| 4           | 2021/1/17      | 2021/1/17         |
| 5           | 2021/1/10      | 2021/1/11         |
| 6           | 2021/1/10      | 2021/1/11         |
| 7           | 2021/1/17      | 2021/1/17         |
| 8           | 2021/1/16      | 2021/1/16         |
| 9           | 2021/1/16      | 2021/1/16         |
| 10          | 2021/1/18      | 2021/1/18         |
| 11          | 2021/1/17      | 2021/1/17         |
| 12          | 2021/1/24      | 2021/1/24         |
| 13          | 2021/1/17      | 2021/1/17         |
| 14          | 2021/1/18      | 2021/1/18         |
| 15          | 2021/1/19      | 2021/1/19         |
| 16          | 2021/1/23      | 2021/1/23         |
| 17          | 2021/1/18      | 2021/1/18         |
| 18          | 2021/1/20      | 2021/1/20         |
| 19          | 2021/1/18      | 2021/1/18         |
| 20          | 2021/1/19      | 2021/1/19         |
| 21          | 2021/1/17      | 2021/1/17         |
| 22          | 2021/1/17      | 2021/1/17         |
| 23          | 2021/1/16      | 2021/1/16         |
| 24          | 2021/1/20      | 2021/1/20         |
| 25          | 2021/1/20      | 2021/1/20         |
| 26          | 2021/1/17      | 2021/1/17         |
| 27          | 2021/1/18      | 2021/1/18         |
| 28          | 2021/1/16      | 2021/1/16         |
| 29          | 2021/1/18      | 2021/1/18         |
| 30          | 2021/1/17      | 2021/1/17         |
| 31          | 2021/2/2       | 2021/2/2          |
| 32          | 2021/1/16      | 2021/1/16         |
| 33          | 2021/1/17      | 2021/1/17         |
| 34          | 2021/1/23      | 2021/1/23         |
| 35          | 2021/1/17      | 2021/1/17         |
| 36          | 2021/1/24      | 2021/1/24         |
| 37          | 2021/1/18      | 2021/1/18         |
| 38          | 2021/1/16      | 2021/1/16         |
| 39          | 2021/1/20      | 2021/1/20         |
| 40          | 2021/1/17      | 2021/1/17         |
| 41          | 2021/1/24      | 2021/1/24         |
| 42          | 2021/1/17      | 2021/1/17         |
| 43          | 2021/1/24      | 2021/1/24         |
| 44          | 2021/1/18      | 2021/1/18         |
| 45          | 2021/1/17      | 2021/1/17         |
| 46          | 2021/1/17      | 2021/1/17         |
| 47          | 2021/1/17      | 2021/1/17         |
| 48          | 2021/1/19      | 2021/1/19         |
| 49          | 2021/1/18      | 2021/1/18         |
| 50          | 2021/1/20      | 2021/1/20         |
| 51          | 2021/1/18      | 2021/1/18         |
| 52          | 2021/1/18      | 2021/1/18         |

|     |           |           |
|-----|-----------|-----------|
| 53  | 2021/1/16 | 2021/1/16 |
| 54  | 2021/1/16 | 2021/1/16 |
| 55  | 2021/1/18 | 2021/1/18 |
| 56  | 2021/2/3  | 2021/2/3  |
| 57  | 2021/1/18 | 2021/1/18 |
| 58  | 2021/1/18 | 2021/1/18 |
| 59  | 2021/1/18 | 2021/1/18 |
| 60  | 2021/1/18 | 2021/1/18 |
| 61  | 2021/1/18 | 2021/1/18 |
| 62  | 2021/1/18 | 2021/1/18 |
| 63  | 2021/1/24 | 2021/1/24 |
| 64  | 2021/1/20 | 2021/1/20 |
| 65  | 2021/1/16 | 2021/1/16 |
| 66  | 2021/1/18 | 2021/1/18 |
| 67  | 2021/1/16 | 2021/1/16 |
| 68  | 2021/1/20 | 2021/1/20 |
| 69  | 2021/1/17 | 2021/1/17 |
| 70  | 2021/1/16 | 2021/1/16 |
| 71  | 2021/1/16 | 2021/1/16 |
| 72  | 2021/1/20 | 2021/1/20 |
| 73  | 2021/1/20 | 2021/1/20 |
| 74  | 2021/1/30 | 2021/1/30 |
| 75  | 2021/1/19 | 2021/1/19 |
| 76  | 2021/1/18 | 2021/1/18 |
| 77  | 2021/1/18 | 2021/1/18 |
| 78  | 2021/1/16 | 2021/1/16 |
| 79  | 2021/1/20 | 2021/1/20 |
| 80  | 2021/1/19 | 2021/1/19 |
| 81  | 2021/1/19 | 2021/1/19 |
| 82  | 2021/1/20 | 2021/1/20 |
| 83  | 2021/1/16 | 2021/1/16 |
| 84  | 2021/1/18 | 2021/1/18 |
| 85  | 2021/1/18 | 2021/1/18 |
| 86  | 2021/1/17 | 2021/1/17 |
| 87  | 2021/1/18 | 2021/1/18 |
| 88  | 2021/1/18 | 2021/1/18 |
| 89  | 2021/1/17 | 2021/1/17 |
| 90  | 2021/1/24 | 2021/1/24 |
| 91  | 2021/1/17 | 2021/1/17 |
| 92  | 2021/1/30 | 2021/1/30 |
| 93  | 2021/1/19 | 2021/1/19 |
| 94  | 2021/1/19 | 2021/1/19 |
| 95  | 2021/1/17 | 2021/1/17 |
| 96  | 2021/1/18 | 2021/1/18 |
| 97  | 2021/1/17 | 2021/1/17 |
| 98  | 2021/1/17 | 2021/1/17 |
| 99  | 2021/1/19 | 2021/1/19 |
| 100 | 2021/1/18 | 2021/1/18 |
| 101 | 2021/1/20 | 2021/1/20 |
| 102 | 2021/1/17 | 2021/1/17 |
| 103 | 2021/1/20 | 2021/1/20 |
| 104 | 2021/1/18 | 2021/1/18 |
| 105 | 2021/1/18 | 2021/1/18 |
| 106 | 2021/1/20 | 2021/1/20 |

|     |           |           |
|-----|-----------|-----------|
| 107 | 2021/1/19 | 2021/1/19 |
| 108 | 2021/1/20 | 2021/1/20 |
| 109 | 2021/1/17 | 2021/1/17 |
| 110 | 2021/1/29 | 2021/1/29 |
| 111 | 2021/1/20 | 2021/1/20 |
| 112 | 2021/1/16 | 2021/1/17 |
| 113 | 2021/1/16 | 2021/1/17 |
| 114 | 2021/1/16 | 2021/1/17 |
| 115 | 2021/1/18 | 2021/1/18 |
| 116 | 2021/1/19 | 2021/1/19 |
| 117 | 2021/1/20 | 2021/1/20 |
| 118 | 2021/1/18 | 2021/1/18 |
| 119 | 2021/1/21 | 2021/1/21 |
| 120 | 2021/1/19 | 2021/1/19 |
| 121 | 2021/1/18 | 2021/1/18 |
| 122 | 2021/1/18 | 2021/1/18 |
| 123 | 2021/1/18 | 2021/1/18 |
| 124 | 2021/1/24 | 2021/1/24 |
| 125 | 2021/1/19 | 2021/1/19 |
| 126 | 2021/1/24 | 2021/1/24 |
| 127 | 2021/1/18 | 2021/1/18 |
| 128 | 2021/1/19 | 2021/1/19 |
| 129 | 2021/1/20 | 2021/1/20 |
| 130 | 2021/1/18 | 2021/1/18 |
| 131 | 2021/1/23 | 2021/1/23 |
| 132 | 2021/1/17 | 2021/1/18 |
| 133 | 2021/1/19 | 2021/1/19 |
| 134 | 2021/1/24 | 2021/1/24 |
| 135 | 2021/1/18 | 2021/1/18 |
| 136 | 2021/1/24 | 2021/1/24 |
| 137 | 2021/1/20 | 2021/1/20 |
| 138 | 2021/1/19 | 2021/1/19 |
| 139 | 2021/1/18 | 2021/1/18 |
| 140 | 2021/1/20 | 2021/1/20 |
| 141 | 2021/1/18 | 2021/1/18 |
| 142 | 2021/1/19 | 2021/1/19 |
| 143 | 2021/1/28 | 2021/1/28 |
| 144 | 2021/1/18 | 2021/1/18 |
| 145 | 2021/1/19 | 2021/1/19 |
| 146 | 2021/1/18 | 2021/1/18 |
| 147 | 2021/1/19 | 2021/1/19 |
| 148 | 2021/1/18 | 2021/1/18 |
| 149 | 2021/1/19 | 2021/1/19 |
| 150 | 2021/1/23 | 2021/1/23 |
| 151 | 2021/1/20 | 2021/1/20 |
| 152 | 2021/1/19 | 2021/1/19 |
| 153 | 2021/1/19 | 2021/1/19 |
| 154 | 2021/1/30 | 2021/1/30 |
| 155 | 2021/1/19 | 2021/1/19 |
| 156 | 2021/1/19 | 2021/1/19 |
| 157 | 2021/1/24 | 2021/1/24 |
| 158 | 2021/1/19 | 2021/1/19 |
| 159 | 2021/1/19 | 2021/1/19 |
| 160 | 2021/1/19 | 2021/1/19 |

|     |           |           |
|-----|-----------|-----------|
| 161 | 2021/1/19 | 2021/1/19 |
| 162 | 2021/1/19 | 2021/1/19 |
| 163 | 2021/1/19 | 2021/1/19 |
| 164 | 2021/1/24 | 2021/1/24 |
| 165 | 2021/1/19 | 2021/1/19 |
| 166 | 2021/1/19 | 2021/1/19 |
| 167 | 2021/1/19 | 2021/1/19 |
| 168 | 2021/1/19 | 2021/1/19 |
| 169 | 2021/1/19 | 2021/1/19 |
| 170 | 2021/1/19 | 2021/1/19 |
| 171 | 2021/1/20 | 2021/1/20 |
| 172 | 2021/1/20 | 2021/1/20 |
| 173 | 2021/1/15 | 2021/1/19 |
| 174 | 2021/1/20 | 2021/1/20 |
| 175 | 2021/1/20 | 2021/1/20 |
| 176 | 2021/1/30 | 2021/1/30 |
| 177 | 2021/1/24 | 2021/1/24 |
| 178 | 2021/1/20 | 2021/1/20 |
| 179 | 2021/1/24 | 2021/1/24 |
| 180 | 2021/1/19 | 2021/1/19 |
| 181 | 2021/1/19 | 2021/1/19 |
| 182 | 2021/1/19 | 2021/1/19 |
| 183 | 2021/1/19 | 2021/1/19 |
| 184 | 2021/1/19 | 2021/1/19 |
| 185 | 2021/1/19 | 2021/1/19 |
| 186 | 2021/1/18 | 2021/1/19 |
| 187 | 2021/1/19 | 2021/1/19 |
| 188 | 2021/1/19 | 2021/1/19 |
| 189 | 2021/1/18 | 2021/1/19 |
| 190 | 2021/1/18 | 2021/1/19 |
| 191 | 2021/1/16 | 2021/1/20 |
| 192 | 2021/1/19 | 2021/1/20 |
| 193 | 2021/1/20 | 2021/1/20 |
| 194 | 2021/1/20 | 2021/1/20 |
| 195 | 2021/1/24 | 2021/1/24 |
| 196 | 2021/1/24 | 2021/1/24 |
| 197 | 2021/1/20 | 2021/1/20 |
| 198 | 2021/1/19 | 2021/1/20 |
| 199 | 2021/1/24 | 2021/1/24 |
| 200 | 2021/1/28 | 2021/1/28 |
| 201 | 2021/1/24 | 2021/1/24 |
| 202 | 2021/1/16 | 2021/1/21 |
| 203 | 2021/1/19 | 2021/1/21 |
| 204 | 2021/1/17 | 2021/1/21 |
| 205 | 2021/1/18 | 2021/1/21 |
| 206 | 2021/1/19 | 2021/1/21 |
| 207 | 2021/1/28 | 2021/1/28 |
| 208 | 2021/1/20 | 2021/1/21 |
| 209 | 2021/1/20 | 2021/1/21 |
| 210 | 2021/1/20 | 2021/1/21 |
| 211 | 2021/1/20 | 2021/1/21 |
| 212 | 2021/1/23 | 2021/1/23 |
| 213 | 2021/1/20 | 2021/1/21 |
| 214 | 2021/1/20 | 2021/1/21 |

|     |           |           |
|-----|-----------|-----------|
| 215 | 2021/1/21 | 2021/1/21 |
| 216 | 2021/1/20 | 2021/1/21 |
| 217 | 2021/1/30 | 2021/1/30 |
| 218 | 2021/1/24 | 2021/1/24 |
| 219 | 2021/1/24 | 2021/1/24 |
| 220 | 2021/1/20 | 2021/1/21 |
| 221 | 2021/1/20 | 2021/1/21 |
| 222 | 2021/1/20 | 2021/1/21 |
| 223 | 2021/1/20 | 2021/1/21 |
| 224 | 2021/1/20 | 2021/1/21 |
| 225 | 2021/1/20 | 2021/1/21 |
| 226 | 2021/1/30 | 2021/1/30 |
| 227 | 2021/1/24 | 2021/1/24 |
| 228 | 2021/1/24 | 2021/1/24 |
| 229 | 2021/1/20 | 2021/1/22 |
| 230 | 2021/1/21 | 2021/1/22 |
| 231 | 2021/1/21 | 2021/1/22 |
| 232 | 2021/1/21 | 2021/1/22 |
| 233 | 2021/1/24 | 2021/1/24 |
| 234 | 2021/1/24 | 2021/1/24 |
| 235 | 2021/1/21 | 2021/1/22 |
| 236 | 2021/1/22 | 2021/1/22 |
| 237 | 2021/1/23 | 2021/1/23 |
| 238 | 2021/1/22 | 2021/1/22 |
| 239 | 2021/1/22 | 2021/1/22 |
| 240 | 2021/1/23 | 2021/1/23 |
| 241 | 2021/2/2  | 2021/2/2  |
| 242 | 2021/1/24 | 2021/1/24 |
| 243 | 2021/1/21 | 2021/1/22 |
| 244 | 2021/1/29 | 2021/1/29 |
| 245 | 2021/1/24 | 2021/1/24 |
| 246 | 2021/1/24 | 2021/1/24 |
| 247 | 2021/1/28 | 2021/1/28 |
| 248 | 2021/1/30 | 2021/1/30 |
| 249 | 2021/1/21 | 2021/1/22 |
| 250 | 2021/1/24 | 2021/1/24 |
| 251 | 2021/1/25 | 2021/1/25 |
| 252 | 2021/1/30 | 2021/1/30 |
| 253 | 2021/1/24 | 2021/1/24 |
| 254 | 2021/1/31 | 2021/1/31 |
| 255 | 2021/1/24 | 2021/1/24 |
| 256 | 2021/1/24 | 2021/1/24 |
| 257 | 2021/1/28 | 2021/1/28 |
| 258 | 2021/1/25 | 2021/1/25 |
| 259 | 2021/1/25 | 2021/1/25 |
| 260 | 2021/1/24 | 2021/1/24 |
| 261 | 2021/1/24 | 2021/1/24 |
| 262 | 2021/1/30 | 2021/1/30 |
| 263 | 2021/1/24 | 2021/1/24 |
| 264 | 2021/1/24 | 2021/1/24 |
| 265 | 2021/2/3  | 2021/2/3  |
| 266 | 2021/1/30 | 2021/1/30 |
| 267 | 2021/1/31 | 2021/1/31 |
| 268 | 2021/1/25 | 2021/1/25 |



|     |           |           |
|-----|-----------|-----------|
| 269 | 2021/1/24 | 2021/1/24 |
| 270 | 2021/1/24 | 2021/1/24 |
| 271 | 2021/1/25 | 2021/1/25 |
| 272 | 2021/1/24 | 2021/1/24 |
| 273 | 2021/1/25 | 2021/1/25 |
| 274 | 2021/1/30 | 2021/1/30 |
| 275 | 2021/1/30 | 2021/1/30 |
| 276 | 2021/1/22 | 2021/1/22 |
| 277 | 2021/1/24 | 2021/1/24 |
| 278 | 2021/1/24 | 2021/1/24 |
| 279 | 2021/1/25 | 2021/1/25 |
| 280 | 2021/1/30 | 2021/1/30 |
| 281 | 2021/1/19 | 2021/1/22 |
| 282 | 2021/1/22 | 2021/1/22 |
| 283 | 2021/1/20 | 2021/1/22 |
| 284 | 2021/1/30 | 2021/1/30 |
| 285 | 2021/1/22 | 2021/1/22 |
| 286 | 2021/1/30 | 2021/1/30 |
| 287 | 2021/1/24 | 2021/1/24 |
| 288 | 2021/1/24 | 2021/1/24 |
| 289 | 2021/1/24 | 2021/1/24 |
| 290 | 2021/1/24 | 2021/1/24 |
| 291 | 2021/1/22 | 2021/1/22 |
| 292 | 2021/1/22 | 2021/2/2  |
| 293 | 2021/1/24 | 2021/1/24 |
| 294 | 2021/1/22 | 2021/1/23 |
| 295 | 2021/1/30 | 2021/1/30 |
| 296 | 2021/1/24 | 2021/1/24 |
| 297 | 2021/1/24 | 2021/1/24 |
| 298 | 2021/1/24 | 2021/1/24 |
| 299 | 2021/1/24 | 2021/1/24 |
| 300 | 2021/1/23 | 2021/1/23 |
| 301 | 2021/1/23 | 2021/1/23 |
| 302 | 2021/1/24 | 2021/1/24 |
| 303 | 2021/1/24 | 2021/1/24 |
| 304 | 2021/1/24 | 2021/1/24 |
| 305 | 2021/1/24 | 2021/1/24 |
| 306 | 2021/1/24 | 2021/1/24 |
| 307 | 2021/1/24 | 2021/1/24 |
| 308 | 2021/1/24 | 2021/1/24 |
| 309 | 2021/1/30 | 2021/1/30 |
| 310 | 2021/1/31 | 2021/1/31 |
| 311 | 2021/1/24 | 2021/1/24 |
| 312 | 2021/1/24 | 2021/1/24 |
| 313 | 2021/1/30 | 2021/1/30 |
| 314 | 2021/1/24 | 2021/1/24 |
| 315 | 2021/1/24 | 2021/1/24 |
| 316 | 2021/1/30 | 2021/1/30 |
| 317 | 2021/1/24 | 2021/1/24 |
| 318 | 2021/1/23 | 2021/1/23 |
| 319 | 2021/1/24 | 2021/1/24 |
| 320 | 2021/2/3  | 2021/2/3  |
| 321 | 2021/1/23 | 2021/1/23 |
| 322 | 2021/1/30 | 2021/1/30 |

|     |           |           |
|-----|-----------|-----------|
| 323 | 2021/1/23 | 2021/1/23 |
| 324 | 2021/1/23 | 2021/1/23 |
| 325 | 2021/1/23 | 2021/1/23 |
| 326 | 2021/1/24 | 2021/1/24 |
| 327 | 2021/1/23 | 2021/1/24 |
| 328 | 2021/1/30 | 2021/1/30 |
| 329 | 2021/1/30 | 2021/1/30 |
| 330 | 2021/1/26 | 2021/1/26 |
| 331 | 2021/1/24 | 2021/1/24 |
| 332 | 2021/1/24 | 2021/1/24 |
| 333 | 2021/1/26 | 2021/1/26 |
| 334 | 2021/1/30 | 2021/1/30 |
| 335 | 2021/1/30 | 2021/1/30 |
| 336 | 2021/1/30 | 2021/1/30 |
| 337 | 2021/1/30 | 2021/1/30 |
| 338 | 2021/1/30 | 2021/1/30 |
| 339 | 2021/1/30 | 2021/1/30 |
| 340 | 2021/2/1  | 2021/2/1  |
| 341 | 2021/1/30 | 2021/1/30 |
| 342 | 2021/1/30 | 2021/1/30 |
| 343 | 2021/1/30 | 2021/1/30 |
| 344 | 2021/1/28 | 2021/1/28 |
| 345 | 2021/1/30 | 2021/1/30 |
| 346 | 2021/1/30 | 2021/1/30 |
| 347 | 2021/1/30 | 2021/1/30 |
| 348 | 2021/1/30 | 2021/1/30 |
| 349 | 2021/1/25 | 2021/1/26 |
| 350 | 2021/1/25 | 2021/1/26 |
| 351 | 2021/1/24 | 2021/1/26 |
| 352 | 2021/1/25 | 2021/1/26 |
| 353 | 2021/1/26 | 2021/1/26 |
| 354 | 2021/1/26 | 2021/1/26 |
| 355 | 2021/1/26 | 2021/1/26 |
| 356 | 2021/1/26 | 2021/1/26 |
| 357 | 2021/1/30 | 2021/1/30 |
| 358 | 2021/1/28 | 2021/1/28 |
| 359 | 2021/1/30 | 2021/1/30 |
| 360 | 2021/1/30 | 2021/1/30 |
| 361 | 2021/2/3  | 2021/2/3  |
| 362 | 2021/1/30 | 2021/1/30 |
| 363 | 2021/1/30 | 2021/1/30 |
| 364 | 2021/2/2  | 2021/2/2  |
| 365 | 2021/1/30 | 2021/1/30 |
| 366 | 2021/1/30 | 2021/1/30 |
| 367 | 2021/1/30 | 2021/1/30 |
| 368 | 2021/1/30 | 2021/1/30 |
| 369 | 2021/1/27 | 2021/1/27 |
| 370 | 2021/1/27 | 2021/1/27 |
| 371 | 2021/2/2  | 2021/2/2  |
| 372 | 2021/1/31 | 2021/1/31 |
| 373 | 2021/1/23 | 2021/1/26 |
| 374 | 2021/1/24 | 2021/1/26 |
| 375 | 2021/1/24 | 2021/1/26 |
| 376 | 2021/1/30 | 2021/1/30 |

|     |           |           |
|-----|-----------|-----------|
| 377 | 2021/1/23 | 2021/1/26 |
| 378 | 2021/1/30 | 2021/1/30 |
| 379 | 2021/1/26 | 2021/1/27 |
| 380 | 2021/1/30 | 2021/1/30 |
| 381 | 2021/1/29 | 2021/1/29 |
| 382 | 2021/1/29 | 2021/1/29 |
| 383 | 2021/1/30 | 2021/1/30 |
| 384 | 2021/1/27 | 2021/1/27 |
| 385 | 2021/1/27 | 2021/1/27 |
| 386 | 2021/1/27 | 2021/1/27 |
| 387 | 2021/1/27 | 2021/1/27 |
| 388 | 2021/1/27 | 2021/1/27 |
| 389 | 2021/2/1  | 2021/2/1  |
| 390 | 2021/2/1  | 2021/2/1  |
| 391 | 2021/1/28 | 2021/1/28 |
| 392 | 2021/1/27 | 2021/1/27 |
| 393 | 2021/1/27 | 2021/1/27 |
| 394 | 2021/1/30 | 2021/1/30 |
| 395 | 2021/1/28 | 2021/1/28 |
| 396 | 2021/1/21 | 2021/1/27 |
| 397 | 2021/1/22 | 2021/1/28 |
| 398 | 2021/1/30 | 2021/1/30 |
| 399 | 2021/1/30 | 2021/1/30 |
| 400 | 2021/2/2  | 2021/2/2  |
| 401 | 2021/1/30 | 2021/1/30 |
| 402 | 2021/1/28 | 2021/1/28 |
| 403 | 2021/1/28 | 2021/1/28 |
| 404 | 2021/1/30 | 2021/1/30 |
| 405 | 2021/1/30 | 2021/1/30 |
| 406 | 2021/1/30 | 2021/1/30 |
| 407 | 2021/1/28 | 2021/1/29 |
| 408 | 2021/1/30 | 2021/1/30 |
| 409 | 2021/1/30 | 2021/1/30 |
| 410 | 2021/1/17 | 2021/1/31 |
| 411 | 2021/1/29 | 2021/1/30 |
| 412 | 2021/1/29 | 2021/1/30 |
| 413 | 2021/1/30 | 2021/1/30 |
| 414 | 2021/1/30 | 2021/1/30 |
| 415 | 2021/1/31 | 2021/1/31 |
| 416 | 2021/1/29 | 2021/1/30 |
| 417 | 2021/1/25 | 2021/1/30 |
| 418 | 2021/1/31 | 2021/1/31 |
| 419 | 2021/1/31 | 2021/1/31 |
| 420 | 2021/1/30 | 2021/1/31 |
| 421 | 2021/1/30 | 2021/1/31 |
| 422 | 2021/2/1  | 2021/2/1  |
| 423 | 2021/2/3  | 2021/2/3  |
| 424 | 2021/2/2  | 2021/2/2  |
| 425 | 2021/2/2  | 2021/2/2  |
| 426 | 2021/2/2  | 2021/2/2  |
| 427 | 2021/2/3  | 2021/2/3  |
| 428 | 2021/2/2  | 2021/2/3  |
| 429 | 2021/2/3  | 2021/2/3  |
| 430 | 2021/2/3  | 2021/2/4  |

|     |          |           |
|-----|----------|-----------|
| 431 | 2021/2/4 | 2021/2/4  |
| 432 | 2021/2/6 | 2021/2/6  |
| 433 | 2021/2/5 | 2021/2/5  |
| 434 | 2021/2/5 | 2021/2/6  |
| 435 | 2021/2/9 | 2021/2/10 |
